# Supplementary material for: Androgen Receptor Mutations and Polymorphisms in African American Prostate Cancer
Source: PubMed Central journal article supplement — Int J Biol Sci. 2014 Jun 5;10(6):643–51. doi: 10.7150/ijbs.8974 (PMC4062957; doi:10.7150/ijbs.8974), 2014-06-05
Supplement: ijbsv10p0643s1.pdf [file ijbsv10p0643s1.pdf]

**Supplementary Table 1:** Descriptives of the study cohort used for determination of AR mutations and polymorphisms

| <b>Source of gDNA</b>            | <b>Ethnic group</b>      |                            |
|----------------------------------|--------------------------|----------------------------|
|                                  | <b>African Americans</b> | <b>Caucasian Americans</b> |
| Sporadic PCa tissues             | N = 200                  | N = 100                    |
| WBCs of PCa patients             | N = 88                   | N = 74                     |
| WBCs of unrelated healthy donors | N = 61                   | N = 63                     |

**Supplementary Table 2: AR-specific PCR primer pairs flanking intron-exon boundaries.<sup>a</sup>**

| Exon OR Polymorphic Site | 5'-sense                    | 5'-antisense                   | T <sub>m</sub> / Product size (bp) |
|--------------------------|-----------------------------|--------------------------------|------------------------------------|
| <b><i>Exon 1a</i></b>    | CACAGGCTACCTGGTCCTGG        | CTGCCTTACCACAACCTCCTTGGC       | 59°C / 423                         |
| <b><i>Exon 1b</i></b>    | GCTCCCACTTCCTCCAAGGACAATTAC | CGGGTTCTCCAGCTTGATGCG          | 58°C / 372                         |
| <b><i>Exon 1c</i></b>    | GACTTCACCGCACCTGATGTGTGGT   | CCAGAACACAGAGTGACTCTGCC        | 56°C / 342                         |
| <b><i>Exon 2</i></b>     | GCCTGCAGGTTAATGCTGAAGACC    | CCTAAGTTATTTGATAGGGCCTTGCC     | 58°C / 379                         |
| <b><i>Exon 3</i></b>     | GTTGGTGCCATACTCTGTCCAC      | CTGATGGCCACGTTGCCTATGAA        | 58°C / 413                         |
| <b><i>Exon 4</i></b>     | GGAGTTTAGAGTCTGTGACCAGG     | GATCCCCCTTATCTCATGCTCCC        | 57°C / 455                         |
| <b><i>Exon 5</i></b>     | CAACCCGTCAGTACCCAGACTGACC   | AGCTTCACTGTCACCCCATCACCATC     | 61°C / 284                         |
| <b><i>Exon 6</i></b>     | CTCTGGGCTTATTGGTAAACTTCC    | GTCCAGGAGCTGGCTTTTCCCTA        | 56°C / 292                         |
| <b><i>Exon 7</i></b>     | CTTTCAGATCGGATCCAGCTATCC    | CTCTATCAGGCTGTTCTCCCTGAT       | 57°C / 415                         |
| <b><i>Exon 8</i></b>     | GAGGCCACCTCCTTGTCAACCCTG    | GGAACATGTTTCATGACAGACTGTACATCA | 61°C / 346                         |

<sup>a</sup> Acces # NM\_000023.
